# Supplementary material for: Understanding Enablers and Barriers to the Implementation of Nutrition Standards in Publicly Funded Institutions in Victoria
Source: MDPI journal article supplement (doi:10.3390/nu14132628), 2022-06-24
Supplement: s1 [file s1]

Supplementary Table S1. Participant responses to the pre-interview questionnaire by employing publicly-funded institution

| Questionnaire                                                       | Health<br>(n=15) | School<br>(n=10) | Workplace<br>(including sport<br>and recreation)<br>(n=11) | Manufacturer/<br>supplier/<br>retailer<br>(n=5) | Total<br>(n=41) |
|---------------------------------------------------------------------|------------------|------------------|------------------------------------------------------------|-------------------------------------------------|-----------------|
| <b>Organisational characteristics</b>                               |                  |                  |                                                            |                                                 |                 |
| <b>Number of staff/students</b>                                     |                  |                  |                                                            |                                                 |                 |
| <1000                                                               | 6                | 9                | 0                                                          | 2                                               | 21              |
| 1000-9999                                                           | 6                | 1                | 0                                                          | 1                                               | 13              |
| ≥10000                                                              | 1                | 1                | 3                                                          | 0                                               | 5               |
| <b>Health's level of priority</b>                                   |                  |                  |                                                            |                                                 |                 |
| High priority                                                       | 10               | 5                | 5                                                          | 5                                               | 25              |
| Moderate priority                                                   | 4                | 3                | 4                                                          | 0                                               | 10              |
| Low priority                                                        | 1                | 2                | 1                                                          | 0                                               | 4               |
| Not a priority                                                      | 0                | 0                | 0                                                          | 0                                               | 0               |
| <b>Healthy eating's level of priority</b>                           |                  |                  |                                                            |                                                 |                 |
| High priority                                                       | 3                | 4                | 2                                                          | 5                                               | 14              |
| Moderate priority                                                   | 9                | 2                | 5                                                          | 0                                               | 16              |
| Low priority                                                        | 2                | 3                | 3                                                          | 0                                               | 8               |
| Not a priority                                                      | 1                | 1                | 0                                                          | 0                                               | 2               |
| <b>General</b>                                                      |                  |                  |                                                            |                                                 |                 |
| Aware of Guidelines/Policy                                          | 15               | 10               | 11                                                         | 5                                               | 41              |
| Knows where to access Guidelines/Policy                             | 15               | 9                | 11                                                         | 5                                               | 40              |
| <b>Stage of implementation of Guidelines/Policy</b>                 |                  |                  |                                                            |                                                 |                 |
| Fully implemented                                                   | 2                | 4                | 2                                                          | 1                                               | 9               |
| In the process of implementing                                      | 7                | 4                | 8                                                          | 1                                               | 19              |
| Planning to implement                                               | 3                | 1                | 0                                                          | 1                                               | 5               |
| Aware of Healthy Eating Advisory Service                            | 15               | 10               | 11                                                         | 5                                               | 41              |
| Received support from HEAS                                          | 14               | 6                | 11                                                         | 4                                               | 35              |
| Aware of Cancer Council Victoria<br>Achievement Program (AP)        | 11               | 7                | 10                                                         | 1                                               | 29              |
| Received support from Cancer Council<br>Victoria AP                 | 5                | 6                | 5                                                          | 0                                               | 15              |
| Aware of other policies/guidelines                                  | 6                | 4                | 6                                                          | 3                                               | 19              |
| <b>Implementation</b>                                               |                  |                  |                                                            |                                                 |                 |
| Organisation sells/provides food                                    | 15               | 10               | 11                                                         | 4                                               | 40              |
| <b>Methods of food provision</b>                                    |                  |                  |                                                            |                                                 |                 |
| Catering                                                            | 1                | 0                | 0                                                          | 0                                               | 1               |
| Catering, Fundraising                                               | 1                | 1                | 1                                                          | 0                                               | 3               |
| Food outlet                                                         | 0                | 1                | 0                                                          | 0                                               | 1               |
| Food outlet, Catering                                               | 0                | 4                | 3                                                          | 0                                               | 7               |
| Food outlet, Catering, Fundraising                                  | 1                | 0                | 0                                                          | 0                                               | 1               |
| Food outlet, Fundraising                                            | 0                | 3                | 0                                                          | 0                                               | 3               |
| Food outlet, Vending machine, Catering                              | 4                | 0                | 2                                                          | 1                                               | 7               |
| Food outlet, Vending machine, Catering,<br>Fundraising              | 7                | 0                | 2                                                          | 1                                               | 10              |
| Fundraising, Other                                                  | 0                | 1                | 0                                                          | 0                                               | 1               |
| Other                                                               | 0                | 0                | 1                                                          | 2                                               | 3               |
| Vending machine                                                     | 1                | 0                | 0                                                          | 0                                               | 1               |
| Vending machine, Catering                                           | 0                | 0                | 1                                                          | 0                                               | 1               |
| Vending machine, Catering, Fundraising                              | 0                | 0                | 1                                                          | 0                                               | 1               |
| <b>Nutrition composition of foods assessed</b>                      | 15               | 8                | 11                                                         | 4                                               | 37              |
| <b>Changes made to improve nutritional<br/>composition of foods</b> | 15               | 8                | 11                                                         | 5                                               | 39              |

|                                                              |    |   |    |   |    |
|--------------------------------------------------------------|----|---|----|---|----|
| <b>Identified barriers to implementing Guidelines/Policy</b> | 15 | 8 | 11 | 4 | 38 |
| <b>Identified enablers to implementing Guidelines/Policy</b> | 13 | 4 | 9  | 4 | 30 |
| <b>Monitoring changes and evaluating impact</b>              | 13 | 8 | 11 | 2 | 34 |
| <b>Process Outcomes</b>                                      |    |   |    |   |    |
| <b>Adequate support by organisation</b>                      | 9  | 7 | 7  | 4 | 27 |
| <b>Adequate resources provided by organisation</b>           | 6  | 7 | 6  | 3 | 22 |
